# Supplementary material for: Hydrodesulfurization of dibenzothiophene using Pd-promoted Co–Mo/Al2O3and Ni–Mo/Al2O3catalysts coupled with ionic liquids at ambient operating conditions
Source: Royal Society of Chemistry journal article supplement (doi:10.1039/c9ra00095j), 2019-01-01
Supplement: c9ra00095j1.pdf [file c9ra00095j1.pdf]

# Supporting Information

## Hydrodesulfurization of Dibenzothiophene using Pd promoted Co-Mo/Al<sub>2</sub>O<sub>3</sub> and Ni-Mo/Al<sub>2</sub>O<sub>3</sub> catalysts coupled with ionic liquid at ambient operating conditions

Yaseen Muhammad <sup>a,b</sup>, Ata Ur Rahman <sup>b</sup>, Haroon Ur Rashid <sup>a</sup>, Maria Sahibzada <sup>c</sup>, Sidra Subhan <sup>a,b</sup>, Zhangfa Tong <sup>a\*</sup>

<sup>a</sup> School of Chemistry and Chemical Engineering, Key Laboratory of Petrochemical Resource Processing and Process Intensification Technology, Guangxi University, Guangxi, 530004, P.R. China.

<sup>b</sup> Institute of Chemical Sciences, University of Peshawar, Peshawar, 25120, KP, Pakistan.

<sup>c</sup> Department of Chemistry, University of Umea, Sweden.

Corresponding author: Zhangfa Tong (zhftong@sina.com)

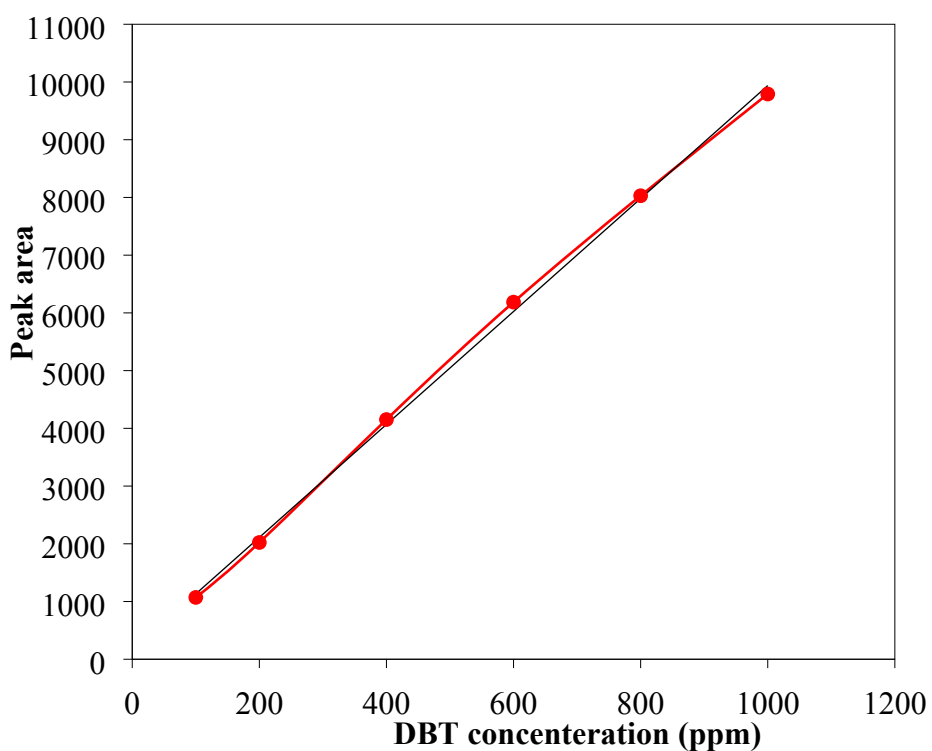

**Figure S1.** Calibration curve of DBT in *n*-Octane

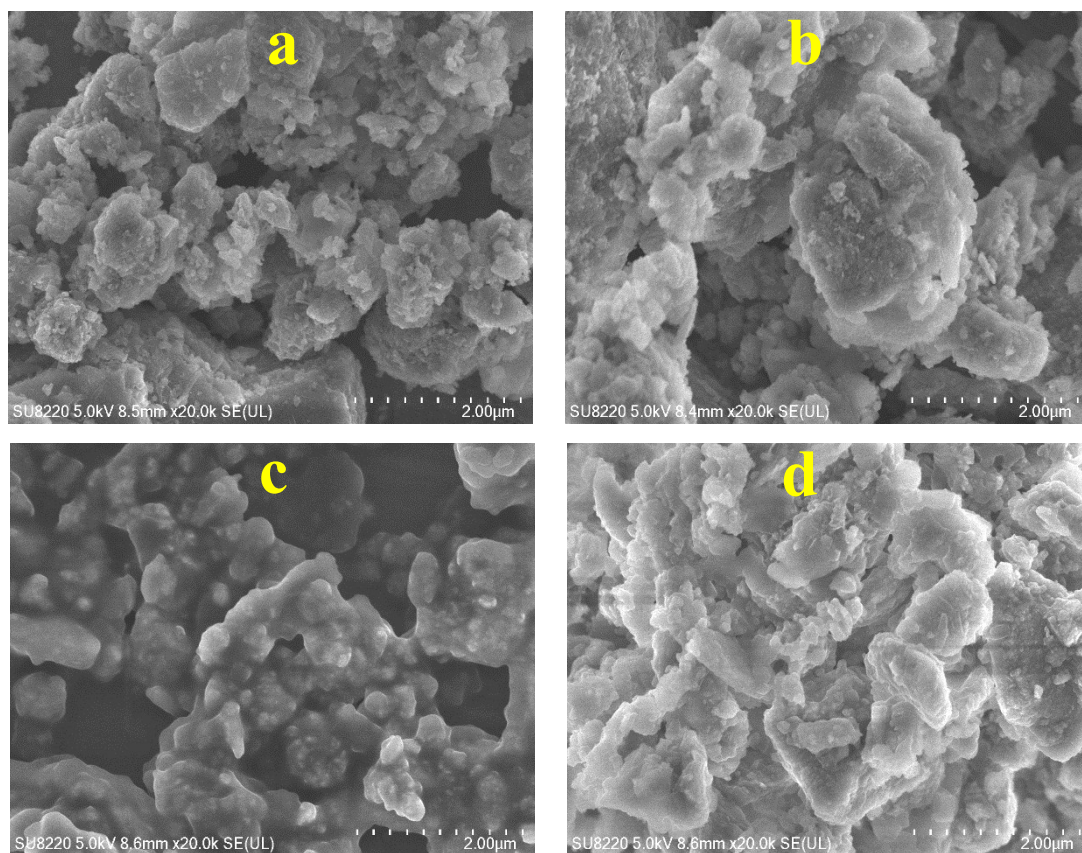

**Figure S2.** FESEM images of spent catalysts: (a) Co-M/ $\text{Al}_2\text{O}_3$ , (b) Ni-Mo/ $\text{Al}_2\text{O}_3$ , (c) Pd-Co-Mo/ $\text{Al}_2\text{O}_3$  and (d) Pd-Ni-Mo/ $\text{Al}_2\text{O}_3$  tested in HDS reaction at 1 MPa  $\text{H}_2$  pressure, 4 h reaction time at 120 °C temperature using 3 g of  $[(n\text{-C}_8\text{H}_{17})(\text{C}_4\text{H}_9)_3\text{P}]\text{Br}$ .

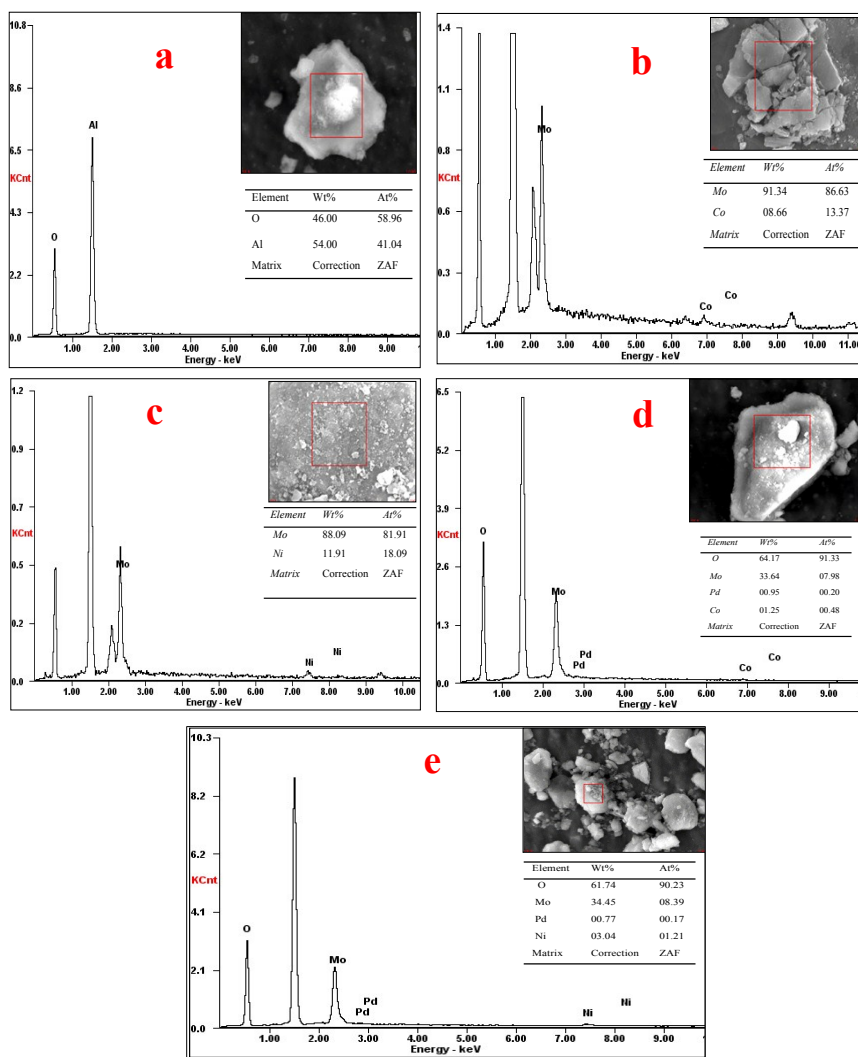

**Figure S3.**

EDX

spectra of:

(a)  $\text{Al}_2\text{O}_3$ ,

(b) Co-

M/Al<sub>2</sub>O<sub>3</sub>, (c) Ni-Mo/Al<sub>2</sub>O<sub>3</sub>, (d) Pd-Co-Mo/Al<sub>2</sub>O<sub>3</sub> and (e) Pd-Ni-Mo/Al<sub>2</sub>O<sub>3</sub>

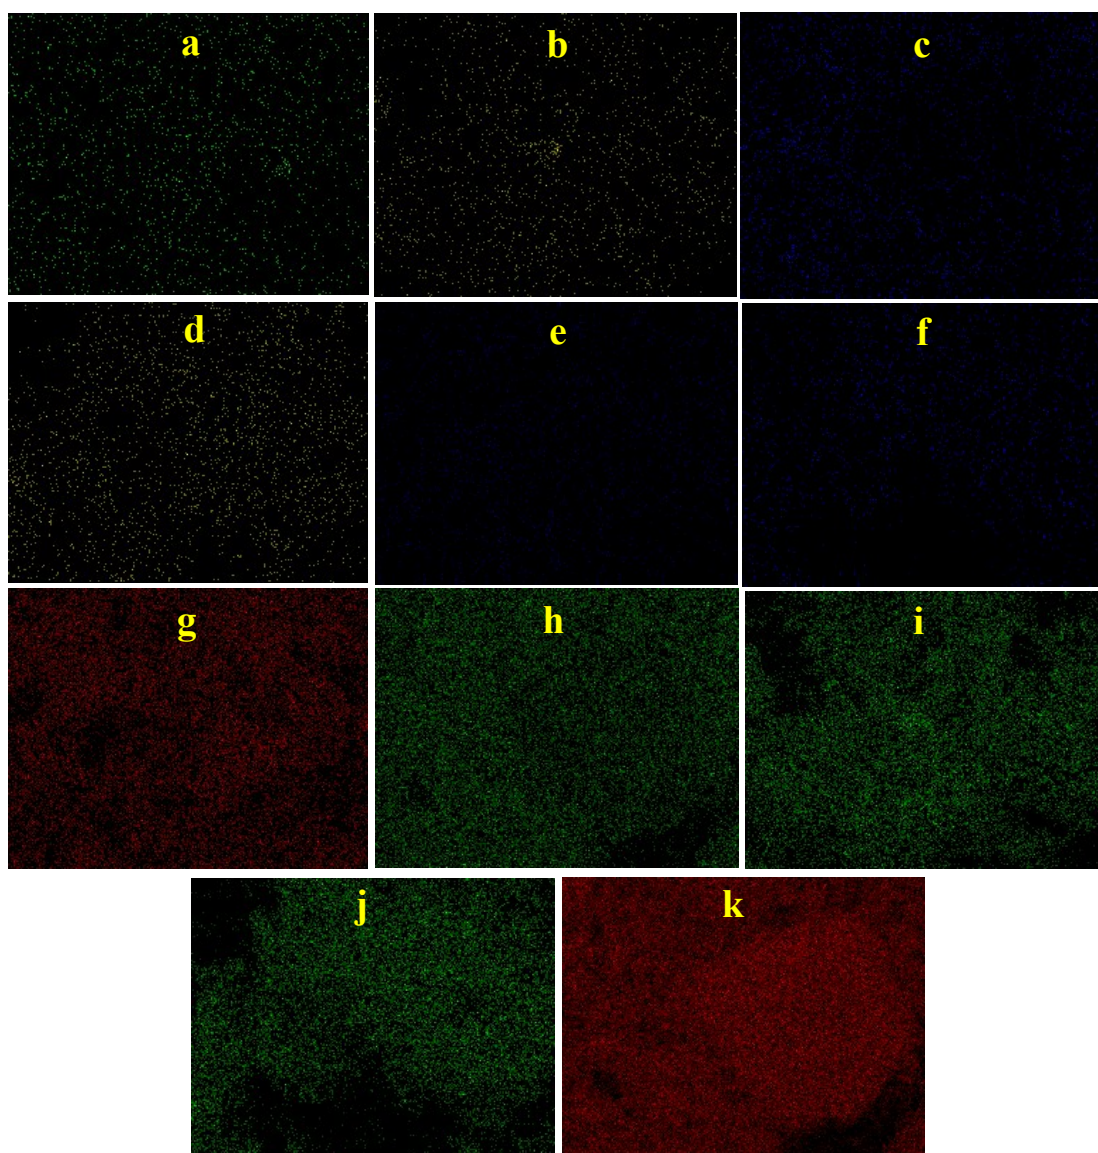



**Figure S4A.** EDX elemental mapping of various metals in fresh catalysts and in support.

Co in (a) Co-Mo/Al<sub>2</sub>O<sub>3</sub>, (b) Pd-Co-Mo/Al<sub>2</sub>O<sub>3</sub>

Ni in: (c) Ni-Mo/Al<sub>2</sub>O<sub>3</sub> and (d) Pd-Ni-Mo/Al<sub>2</sub>O<sub>3</sub>

Pd in: (e) Pd-Co-Mo/Al<sub>2</sub>O<sub>3</sub>, and (f) Pd-Ni-Mo/Al<sub>2</sub>O<sub>3</sub>

Mo in: (g) Co-Mo/Al<sub>2</sub>O<sub>3</sub>, (h) Ni-Mo/Al<sub>2</sub>O<sub>3</sub>, (i) Pd-Co-Mo/Al<sub>2</sub>O<sub>3</sub> and (j) Pd-Ni-Mo/Al<sub>2</sub>O<sub>3</sub>

and Al in: (k) Pd-Co-Mo/Al<sub>2</sub>O<sub>3</sub>

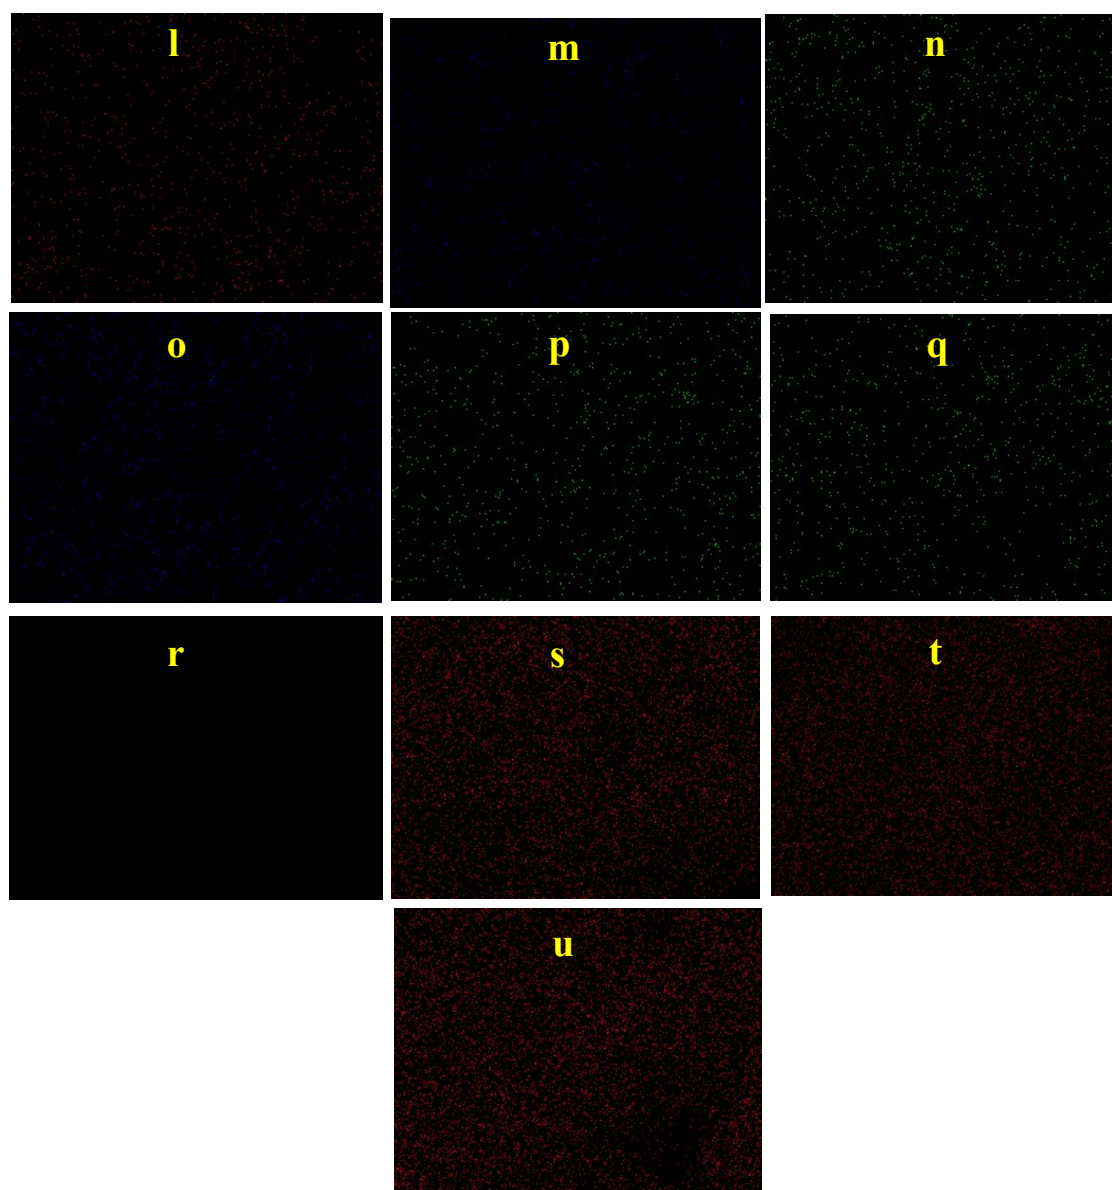

**Figure S4B.** EDX elemental mapping of Co, Ni, Mo and Pd in spent catalysts.

Co in (l) Co-Mo/Al<sub>2</sub>O<sub>3</sub>, (m) Pd-Co-Mo/Al<sub>2</sub>O<sub>3</sub>

Ni in: (n) Ni-Mo/Al<sub>2</sub>O<sub>3</sub> and (o) Pd-Ni-Mo/Al<sub>2</sub>O<sub>3</sub>

Pd in: (p) Pd-Co-Mo/Al<sub>2</sub>O<sub>3</sub>, and (q) Pd-Ni-Mo/Al<sub>2</sub>O<sub>3</sub>

and Mo in: (r) Co-Mo/Al<sub>2</sub>O<sub>3</sub>, (s) Ni-Mo/Al<sub>2</sub>O<sub>3</sub>, (t) Pd-Co-Mo/Al<sub>2</sub>O<sub>3</sub> and (u) Pd-Ni-Mo/Al<sub>2</sub>O<sub>3</sub>

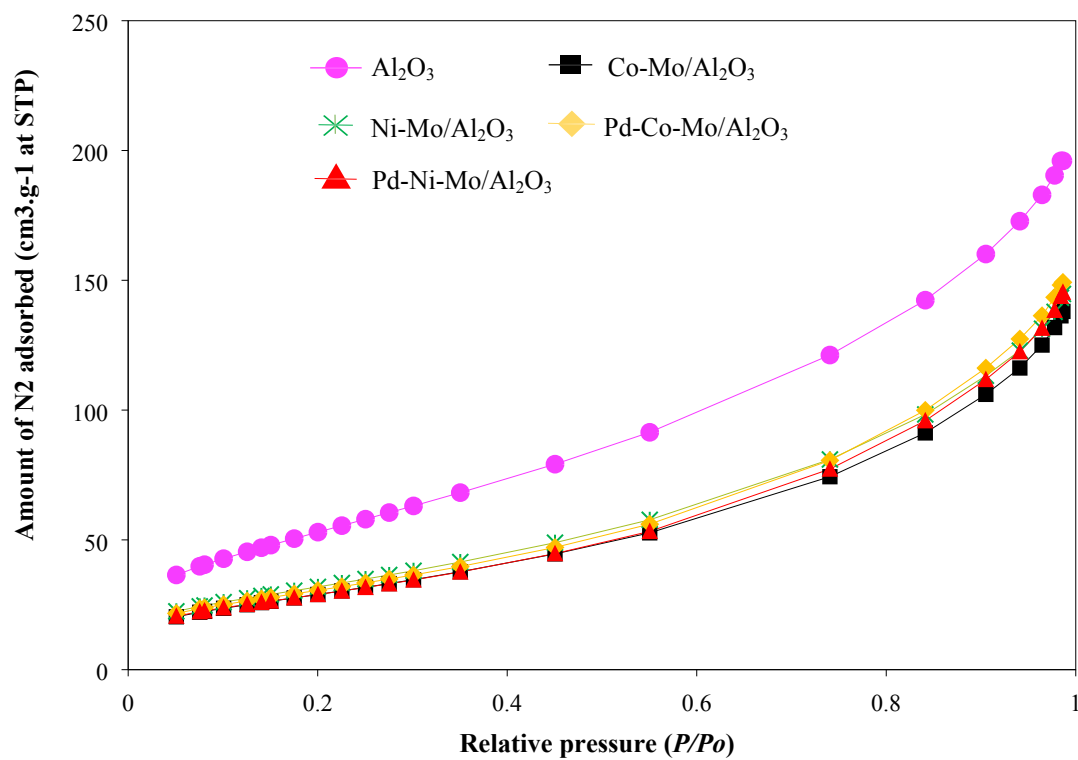

**Figure S5.** Nitrogen adsorption isotherms of Al<sub>2</sub>O<sub>3</sub> support and different types of catalysts

(I)

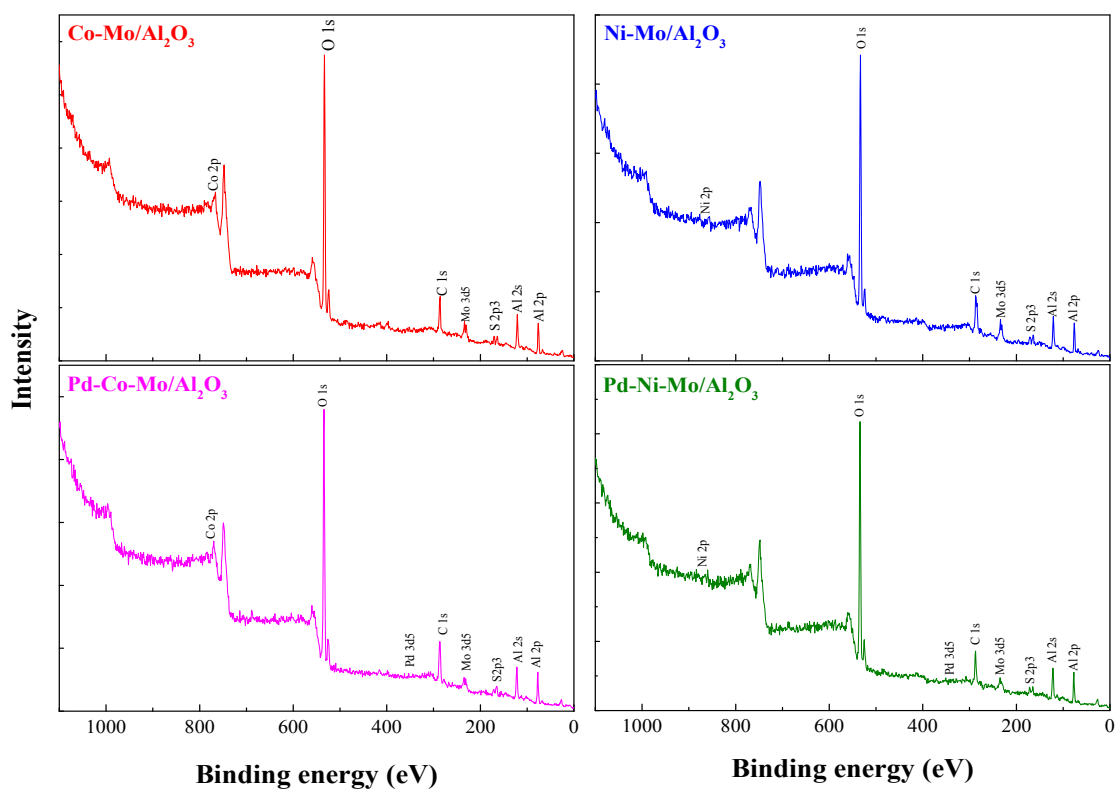

(II)

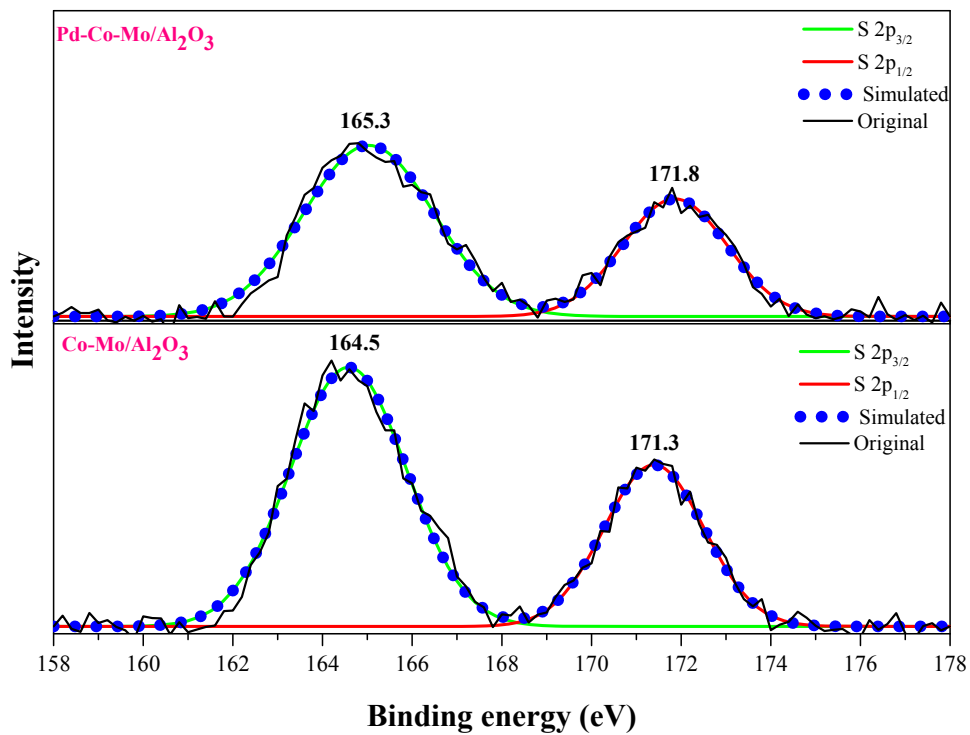

(III)

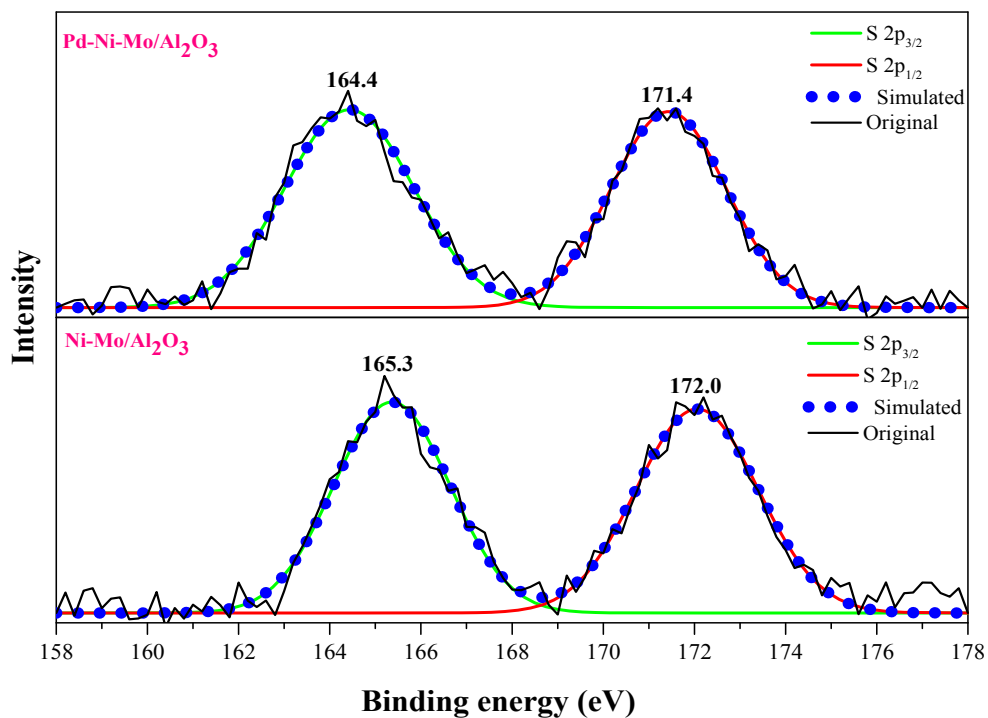

**Figure S6. (I)** Full survey XPS spectra of various catalysts, and **(II)** and **(III)** high resolution XPS spectra of S 2p in various catalysts.



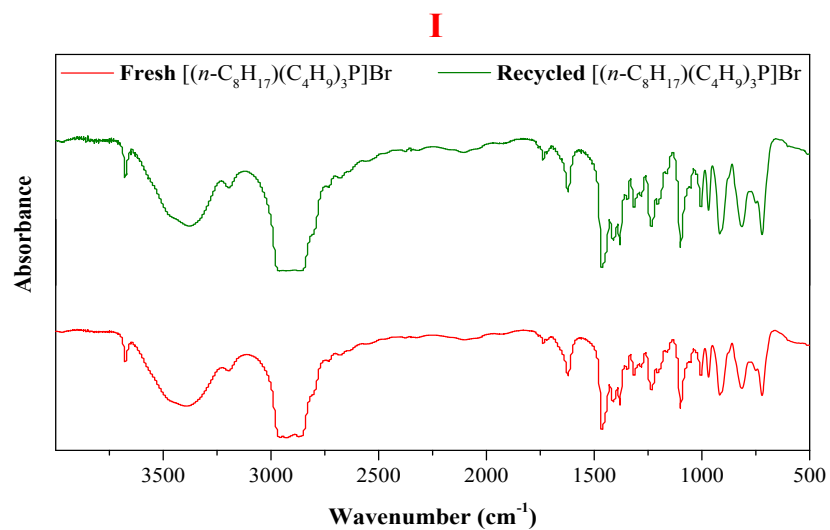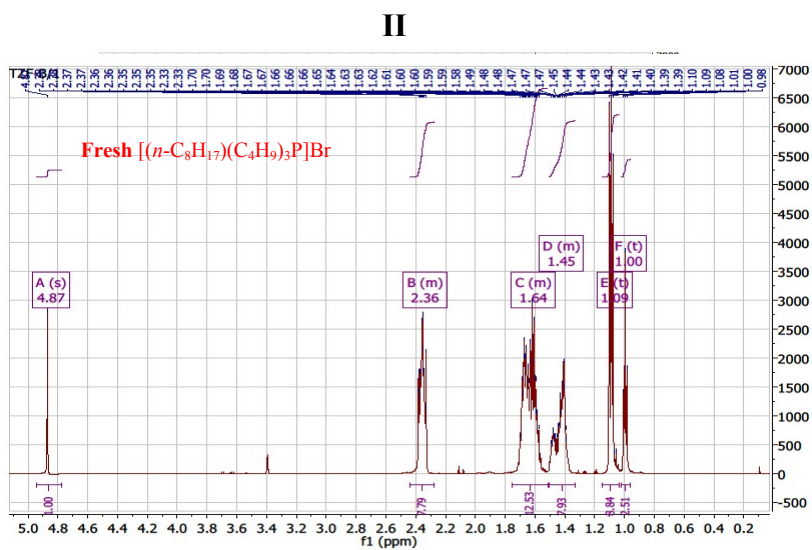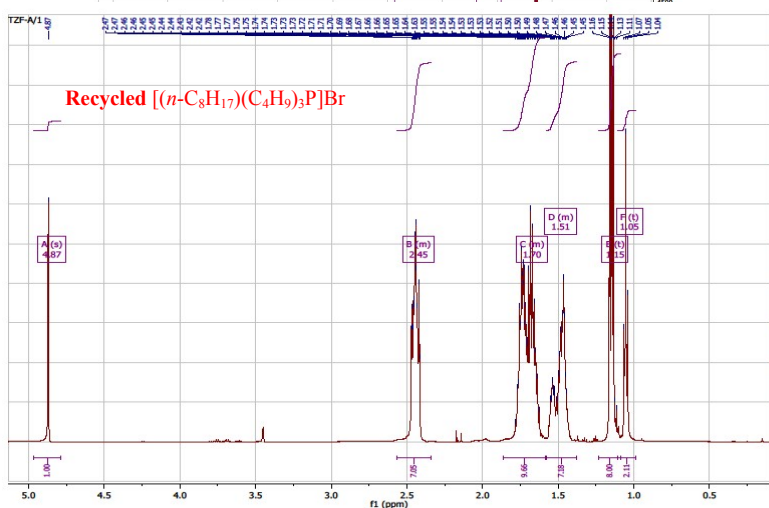

**Figure S7.** (I) FT-IR spectra and (II)  $^1\text{H}$  NMR spectra of fresh and recycled  $[(n\text{-C}_8\text{H}_{17})(\text{C}_4\text{H}_9)_3\text{P}]\text{Br}$  (after being used in HDS coupled with Pd-Ni-Mo/ $\text{Al}_2\text{O}_3$  for four consecutive cycles at 1 MPa  $\text{H}_2$  pressure, 120 °C temperature for 4 h).

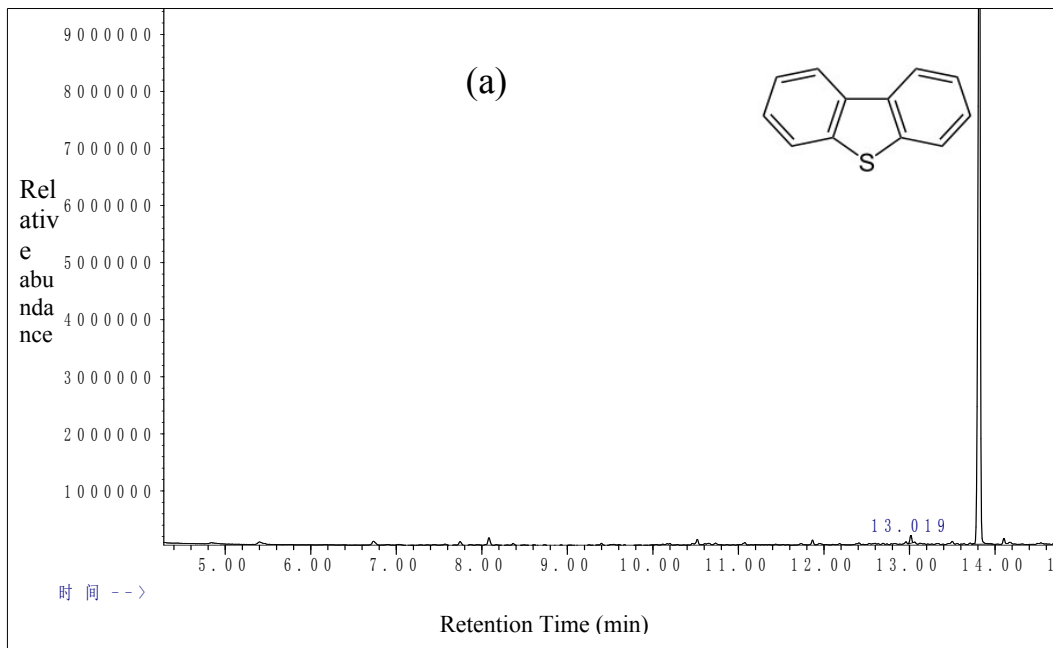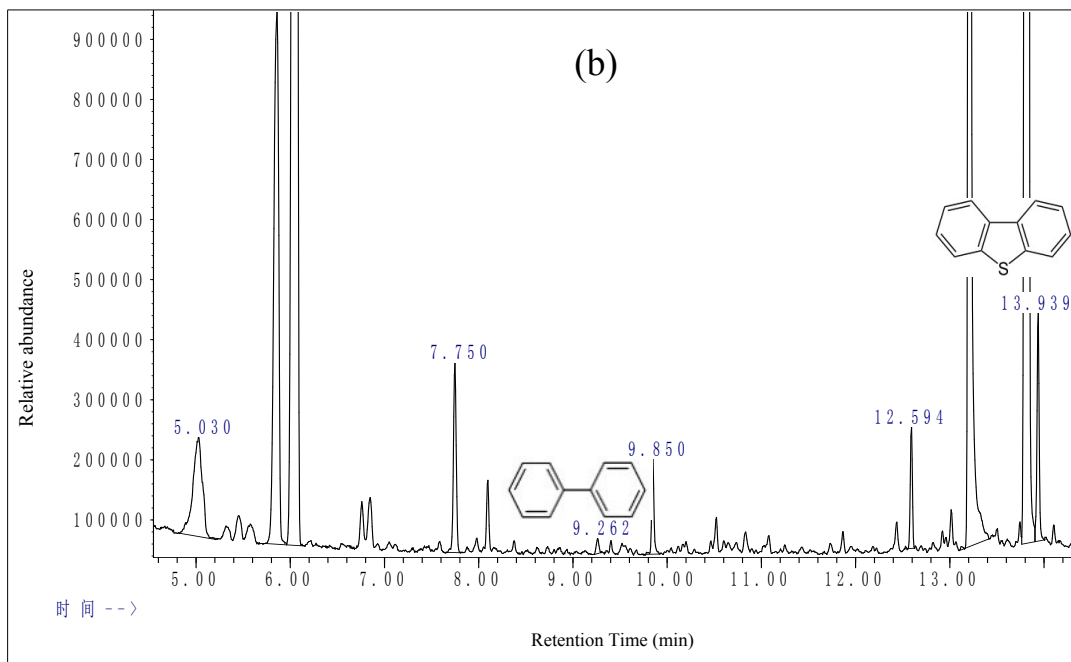

**Figure S8.** GC-MS chromatogram of: (a) Pre-reaction feed sample, (b) Post reaction HDS products sample

| Catalyst type                             | Element concentration (ppm) |      |       |       |      |
|-------------------------------------------|-----------------------------|------|-------|-------|------|
|                                           | Al                          | Co   | Ni    | Mo    | Pd   |
| Co-Mo/Al <sub>2</sub> O <sub>3</sub>      | 69000                       | 6000 | –     | 24000 | –    |
| Ni-Mo/Al <sub>2</sub> O <sub>3</sub>      | 79000                       | –    | 18000 | 35000 | –    |
| Pd-Co-Mo/Al <sub>2</sub> O <sub>3</sub>   | 59000                       | 5000 | –     | 21000 | 3000 |
| Pd-Ni-Mo/Al <sub>2</sub> O <sub>3</sub>   | 66000                       | –    | 9000  | 19000 | 3500 |
| Pd-Co-Mo/Al <sub>2</sub> O <sub>3</sub> * | 38000                       | 4000 | –     | 15000 | 2200 |
| Pd-Ni-Mo/Al <sub>2</sub> O <sub>3</sub> * | 43000                       | –    | 9000  | 17000 | 2500 |

(\*represents spent catalysts)

**Table S1.** ICP-MS elemental distribution data in various catalysts.

**1. *n*-Octane with H<sub>2</sub>**

|   |             |             |             |
|---|-------------|-------------|-------------|
| C | -4.80532100 | 0.01914700  | -0.05711500 |
| C | -3.44233600 | 0.71098100  | 0.03805000  |
| C | -2.26046600 | -0.26198900 | -0.04361000 |
| C | -0.89186800 | 0.42178100  | 0.04902300  |
| C | 0.28952600  | -0.55167600 | -0.03361300 |
| C | 1.65809400  | 0.13220100  | 0.05870100  |
| C | 2.84003100  | -0.84068200 | -0.02292300 |
| C | 4.20294500  | -0.14858000 | 0.07138600  |
| H | -4.93870500 | -0.70552700 | 0.75246200  |
| H | -4.90957000 | -0.52118800 | -1.00344300 |
| H | -5.62539300 | 0.74007100  | 0.00494600  |
| H | -3.38289900 | 1.27211200  | 0.97870200  |
| H | -3.35341900 | 1.45379100  | -0.76416500 |
| H | -2.32167900 | -0.82446000 | -0.98458400 |
| H | -2.34951200 | -1.00533900 | 0.75950100  |
| H | -0.83159500 | 0.98383900  | 0.99013400  |
| H | -0.80433100 | 1.16529900  | -0.75390100 |
| H | 0.22916000  | -1.11386300 | -0.97463800 |
| H | 0.20211900  | -1.29508600 | 0.76942600  |
| H | 1.71940100  | 0.69490000  | 0.99952700  |
| H | 1.74695800  | 0.87535900  | -0.74460800 |
| H | 2.78035000  | -1.40225100 | -0.96329600 |
| H | 2.75153700  | -1.58312600 | 0.77967200  |
| H | 4.30741600  | 0.39231000  | 1.01737400  |
| H | 4.33583600  | 0.57564900  | -0.73867700 |
| H | 5.02306900  | -0.86946500 | 0.00943600  |
| H | 10.24991500 | 2.34266500  | -0.22287900 |
| H | 9.62770600  | 1.93720800  | -0.27037700 |

**2. [(CH<sub>3</sub>)<sub>4</sub>N]Cl with H<sub>2</sub>**

|   |            |            |             |
|---|------------|------------|-------------|
| N | 1.10188800 | 0.00500600 | -0.00008500 |
| C | 0.52666500 | 0.56602300 | 1.27934100  |

|    |             |             |             |
|----|-------------|-------------|-------------|
| C  | 2.58872700  | 0.15584700  | -0.00032300 |
| C  | 0.73066600  | -1.45555200 | -0.10510300 |
| C  | 0.50736400  | 0.74731900  | -1.17393200 |
| H  | -0.56020100 | 0.42729200  | 1.23400500  |
| H  | 0.78864800  | 1.62202900  | 1.33823400  |
| H  | 0.96154500  | 0.02114100  | 2.11700500  |
| H  | 2.98865900  | -0.25161800 | -0.92824700 |
| H  | 3.00223700  | -0.38583000 | 0.84974400  |
| H  | 2.84016500  | 1.21311300  | 0.07718100  |
| H  | -0.36471400 | -1.51279800 | -0.10066700 |
| H  | 1.14411100  | -1.84750200 | -1.03412000 |
| H  | 1.15873200  | -1.97935200 | 0.74931800  |
| H  | -0.57885600 | 0.60160200  | -1.13286300 |
| H  | 0.92880500  | 0.33231800  | -2.08924400 |
| H  | 0.76914700  | 1.80096800  | -1.08110700 |
| Cl | -2.45739500 | -0.35489600 | -0.00000300 |
| H  | -2.52130800 | 3.30899500  | -0.00177700 |
| H  | -2.61500900 | 2.56601200  | 0.00328500  |

### 3. [BMIM]BF<sub>4</sub> with H<sub>2</sub>

|   |             |             |             |
|---|-------------|-------------|-------------|
| C | 0.27946500  | -2.86007900 | 0.47311200  |
| C | 1.11227600  | -2.05911000 | 1.19046300  |
| N | 0.92300900  | -0.76548500 | 0.73626500  |
| C | 0.00291300  | -0.78723600 | -0.22980900 |
| N | -0.40253400 | -2.04485200 | -0.41179100 |
| C | -1.49348400 | -2.44296500 | -1.31016200 |
| C | 1.56279000  | 0.45809000  | 1.26409500  |
| C | 2.97143900  | 0.68953500  | 0.71186100  |
| C | 3.02867800  | 0.96081300  | -0.79555500 |
| C | 4.44843400  | 1.25701000  | -1.28700800 |
| H | 0.10435800  | -3.92048700 | 0.52659500  |
| H | 1.80144100  | -2.29276900 | 1.98308200  |
| H | -0.39522800 | 0.07000500  | -0.74873100 |
| H | -1.93341800 | -1.53912100 | -1.72727200 |
| H | -2.25354100 | -2.96470500 | -0.72988700 |



|   |             |             |             |
|---|-------------|-------------|-------------|
| H | -1.10553800 | -3.08882800 | -2.09874800 |
| H | 1.58026500  | 0.35484700  | 2.35050600  |
| H | 0.88596300  | 1.27899000  | 1.02335900  |
| H | 3.61472400  | -0.16230500 | 0.96495200  |
| H | 3.37976900  | 1.55082600  | 1.25245500  |
| H | 2.37211100  | 1.80503400  | -1.03361900 |
| H | 2.63193500  | 0.09786400  | -1.34263200 |
| H | 4.46133200  | 1.44492000  | -2.36328100 |
| H | 5.12178500  | 0.41742100  | -1.08757000 |
| H | 4.86244500  | 2.14000300  | -0.79113700 |
| H | 0.00036900  | 4.68554000  | 0.93385500  |
| H | -0.42693300 | 4.08698900  | 0.80664800  |
| B | -2.47579700 | 1.10577600  | 0.00633100  |
| F | -3.59301400 | 1.89640200  | 0.12683600  |
| F | -2.58640000 | -0.09823300 | 0.74931500  |
| F | -1.29655700 | 1.78735600  | 0.45099800  |
| F | -2.23972200 | 0.73479700  | -1.36309600 |

**4. [(C<sub>8</sub>H<sub>17</sub>)(C<sub>4</sub>H<sub>9</sub>)<sub>3</sub>P]Br with H<sub>2</sub>**

|   |             |             |             |
|---|-------------|-------------|-------------|
| P | -1.51354500 | 0.52283000  | 0.92858100  |
| C | -1.44998600 | -0.60455600 | 2.37755900  |
| C | -1.02178600 | -2.05752700 | 2.11184700  |
| C | -1.22330200 | -2.93877100 | 3.35095000  |
| C | -0.75069800 | -4.37765600 | 3.12381800  |
| C | -1.52640800 | 2.20591200  | 1.67315400  |
| C | -1.62645700 | 3.39881400  | 0.71021600  |
| C | -1.52675000 | 4.74270200  | 1.44549200  |
| C | -1.62162900 | 5.94397700  | 0.50105500  |
| C | -3.06226300 | 0.21338500  | 0.00915400  |
| C | -3.13452100 | 0.77091700  | -1.42196700 |
| C | -4.47334500 | 0.41532600  | -2.08155300 |
| C | -4.56748800 | 0.92100300  | -3.52311600 |
| C | -0.06080400 | 0.33104800  | -0.15209900 |
| C | 1.30596500  | 0.49495100  | 0.52966300  |
| C | 2.45310300  | 0.28749600  | -0.46992500 |

|   |             |             |             |
|---|-------------|-------------|-------------|
| C | 3.84036000  | 0.41804500  | 0.16786300  |
| C | 4.98659500  | 0.23096300  | -0.83305400 |
| C | 6.37781100  | 0.35458600  | -0.20209100 |
| C | 7.52405200  | 0.17391000  | -1.20408400 |
| C | 8.91068700  | 0.30068200  | -0.56668000 |
| H | -2.46046200 | -0.57550000 | 2.80331600  |
| H | -0.79009100 | -0.13323700 | 3.11431500  |
| H | 0.03245100  | -2.07648800 | 1.81873100  |
| H | -1.56411500 | -2.47183400 | 1.25676400  |
| H | -2.28705800 | -2.94212600 | 3.61952700  |
| H | -0.69131700 | -2.50623200 | 4.20872000  |
| H | -0.93255500 | -4.99629900 | 4.00677300  |
| H | 0.32112700  | -4.41127900 | 2.90697500  |
| H | -1.27078400 | -4.83155800 | 2.27646600  |
| H | -0.60939300 | 2.27881800  | 2.26782100  |
| H | -2.35851700 | 2.21992500  | 2.38599100  |
| H | -2.57362700 | 3.35809000  | 0.16424200  |
| H | -0.83178800 | 3.34203000  | -0.04148700 |
| H | -0.57991700 | 4.78304000  | 1.99695800  |
| H | -2.32228800 | 4.80235700  | 2.19756700  |
| H | -1.54760300 | 6.88491500  | 1.05176700  |
| H | -2.57268100 | 5.94977800  | -0.03981700 |
| H | -0.81752800 | 5.92929100  | -0.24078300 |
| H | -3.87746400 | 0.59286000  | 0.63742800  |
| H | -3.13163400 | -0.87971600 | -0.05399000 |
| H | -2.33199500 | 0.31362200  | -2.00691200 |
| H | -2.99477900 | 1.85747500  | -1.43595900 |
| H | -5.29927900 | 0.82894400  | -1.48855400 |
| H | -4.58190900 | -0.67362700 | -2.06832900 |
| H | -5.52763800 | 0.65269500  | -3.97150600 |
| H | -3.77910800 | 0.48199100  | -4.14064700 |
| H | -4.46955700 | 2.01081100  | -3.57453900 |
| H | -0.17993400 | 1.05875900  | -0.96129400 |
| H | -0.18866400 | -0.66251600 | -0.61280400 |

|    |             |             |             |
|----|-------------|-------------|-------------|
| H  | 1.40872100  | -0.23034600 | 1.34387200  |
| H  | 1.40033300  | 1.49006800  | 0.98184200  |
| H  | 2.35585600  | 1.01648900  | -1.28412100 |
| H  | 2.34839700  | -0.70071700 | -0.93057000 |
| H  | 3.93993200  | -0.32092700 | 0.97324100  |
| H  | 3.93355600  | 1.40345000  | 0.64377700  |
| H  | 4.88719900  | 0.97063700  | -1.63785600 |
| H  | 4.89060200  | -0.75186000 | -1.31078400 |
| H  | 6.47991200  | -0.38832300 | 0.59971500  |
| H  | 6.47256800  | 1.33666800  | 0.28012700  |
| H  | 7.42143700  | 0.91512500  | -2.00600600 |
| H  | 7.43092700  | -0.80748600 | -1.68436000 |
| H  | 9.70452000  | 0.16568400  | -1.30651400 |
| H  | 9.05626700  | -0.45010100 | 0.21649100  |
| H  | 9.04757300  | 1.28575400  | -0.10902700 |
| Br | -1.62506600 | -2.62958700 | -1.52165000 |
| H  | 1.11501200  | -3.99474800 | -2.31868200 |
| H  | 1.78695200  | -4.28251600 | -2.47606600 |

#### 5. [EMIM]AlCl<sub>4</sub> with H<sub>2</sub>

|   |            |             |             |
|---|------------|-------------|-------------|
| C | 3.15732800 | 1.68738000  | -0.50216100 |
| C | 3.48804600 | 0.43051300  | -0.90331300 |
| N | 2.61748100 | -0.43961400 | -0.27500000 |
| C | 1.78201600 | 0.27400100  | 0.48553300  |
| N | 2.09461100 | 1.56737800  | 0.37162000  |
| C | 1.34484000 | 2.67937100  | 0.97122300  |
| C | 2.60349400 | -1.91256400 | -0.41130700 |
| C | 3.52521800 | -2.59874800 | 0.59204500  |
| H | 3.57193200 | 2.64366200  | -0.76979700 |
| H | 4.25075400 | 0.08629100  | -1.57988300 |
| H | 0.96716200 | -0.11402700 | 1.07924000  |
| H | 0.61014700 | 2.27207800  | 1.66222900  |
| H | 0.82055500 | 3.21888300  | 0.18327500  |
| H | 2.03842400 | 3.33537800  | 1.49701000  |
| H | 2.89707800 | -2.12910500 | -1.43937000 |

|    |             |             |             |
|----|-------------|-------------|-------------|
| H  | 1.56587700  | -2.22743600 | -0.29491900 |
| H  | 3.47791500  | -3.67912500 | 0.43938900  |
| H  | 3.21493100  | -2.39163800 | 1.61858400  |
| H  | 4.56448100  | -2.28320100 | 0.47079800  |
| H  | -1.36899700 | 4.35712400  | -1.45260000 |
| H  | -1.22224000 | 5.08694600  | -1.41566000 |
| Al | -1.97789300 | -0.24702300 | -0.04692600 |
| Cl | -1.40261500 | 0.34024100  | 1.98870500  |
| Cl | -0.96130100 | 1.14928100  | -1.38592200 |
| Cl | -4.08807100 | -0.23937300 | -0.31356600 |
| Cl | -1.08129000 | -2.20418500 | -0.37490600 |

**Table S2.** DFT simulation coordinates of optimized structures in Figure 8 using Gaussian 09 software package [1].

1. Frisch, M. J.; Trucks, G. W.; Schlegel, H. B.; Scuseria, G. E.; Robb, M. A.; Cheeseman, J. R.; Scalmani, G.; Barone, V.; Mennucci, B.; Petersson, G. A.; Nakatsuji, H.; Caricato, M.; Li, X.; Hratchian, H. P.; Izmaylov, A. F.; Bloino, J.; Zheng, G.; Sonnenberg, J. L.; Hada, M.; Ehara, M.; Toyota, K.; Fukuda, R.; Hasegawa, J.; Ishida, M.; Nakajima, T.; Honda, Y.; Kitao, O.; Nakai, H.; Vreven, T.; Montgomery Jr, J. A.; Peralta, J. E.; Ogliaro, F.; Bearpark, M.; Heyd, J. J.; Brothers, E.; Kudin, K. N.; Staroverov, V. N.; Kobayashi, R.; Normand, J.; Raghavachari, K.; Rendell, A.; Burant, J. C.; Iyengar, S. S.; Tomasi, J.; Cossi, M.; Rega, N.; Millam, J. M.; Klene, M.; Knox, J. E.; Cross, J. B.; Bakken, V.; Adamo, C.; Jaramillo, J.; Gomperts, R.; Stratmann, R. E.; Yazyev, O.; Austin, A. J.; Cammi, R.; Pomelli, C.; Ochterski, J. W.; Martin, R. L.; Morokuma, K.; Zakrzewski, V. G.; Voth, G. A.; Salvador, P.; Dannenberg, J. J.; Dapprich, S.; Daniels, A. D.; Farkas, Ö.; Foresman, J. B.; Ortiz, J. V.; Cioslowski, J.; Fox, D. J., Gaussian software, version 09 revision D01. Gaussian Inc.: Wallingford, CT, USA 2009.
